# Supplementary material for: Interlayer modification of a layered H-octosilicate (H-RUB-18) with methanol: formation of a highly ordered organosilicate nanohybrid
Source: Royal Society of Chemistry journal article supplement (doi:10.1039/b915818a), 2010-01-01
Supplement: b915818a.pdf [file b915818a.pdf]

## Electronic Supplementary Information

### Interlayer modification of a layered polysilicic acid H-octosilicate (H-RUB-18) with methanol : Formation of a highly ordered organosilicate nanohybrid

Shosuke Kiba,<sup>a,c,d</sup> Tetsuro Itagaki,<sup>b</sup> Teruyuki Nakato<sup>c</sup> and Kazuyuki Kuroda<sup>a,b,d\*</sup>

<sup>a</sup>Department of Nano-Science and Nano-Engineering, Faculty of Science & Engineering, Waseda University, 3-4-1 Ohkubo, Shinjuku-ku, Tokyo 169-8555, Japan.

<sup>b</sup>Department of Applied Chemistry, Faculty of Science & Engineering, Waseda University, 3-4-1 Ohkubo, Shinjuku-ku, Tokyo 169-8555, Japan.

<sup>c</sup>Institute of Symbiote Science and Technology, Tokyo University of Agriculture and Technology, 2-24-16 Nakacho, Koganei-shi, Tokyo 184-8588, Japan.

<sup>d</sup>Kagami Memorial Research Institute for Materials Science and Technology, Waseda University, 2-8-26 Nishiwaseda, Shinjuku-ku, Tokyo 169-0051, Japan.

\*kuroda@waseda.jp

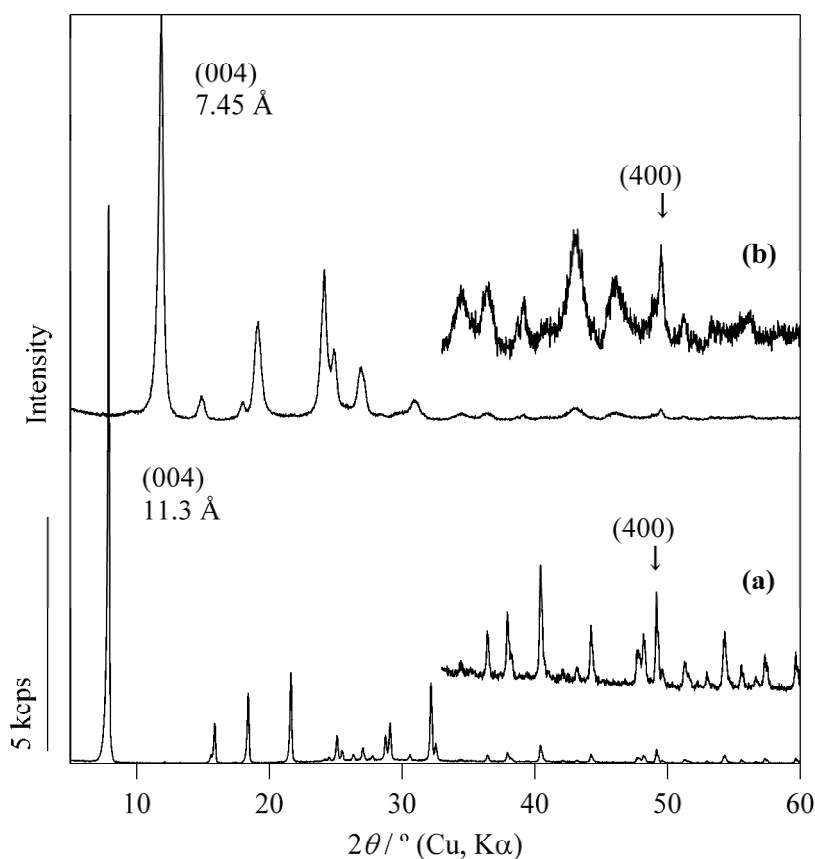

Fig. S1 XRD patterns of (a) Na-octosilicate and (b) H-octosilicate.

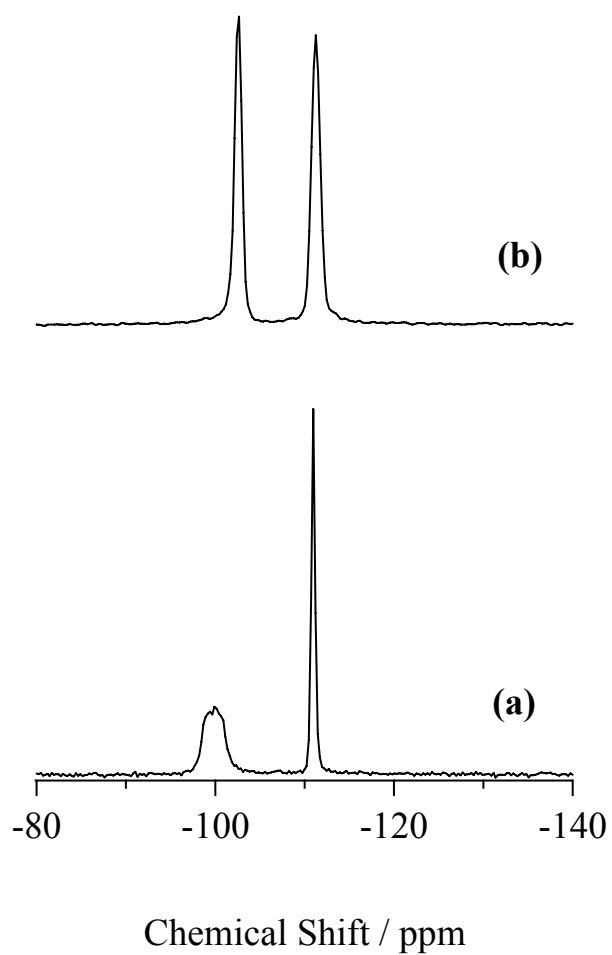

**Fig. S2**  $^{29}\text{Si}$  HD/MAS NMR spectra of **(a)** Na-octosilicate and **(b)** H-octosilicate.

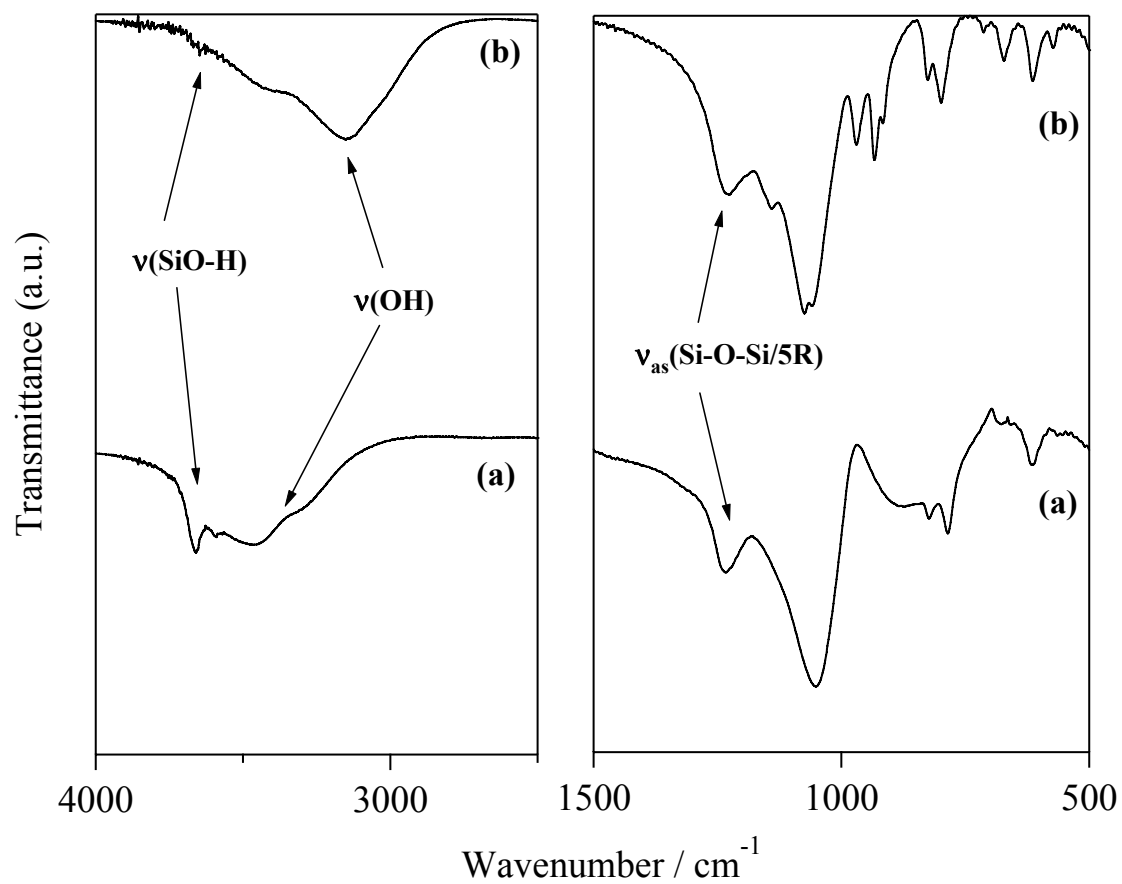

**Fig. S3** IR spectra of (a) Na-octosilicate and (b) H-octosilicate.

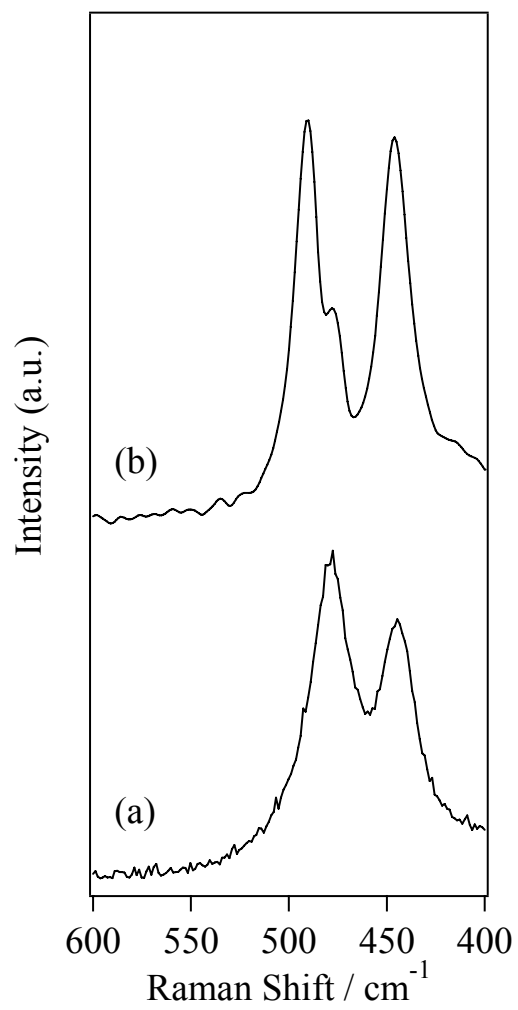

**Fig. S4** Raman spectra of **(a)** Na-octosilicate and **(b)** H-octosilicate.

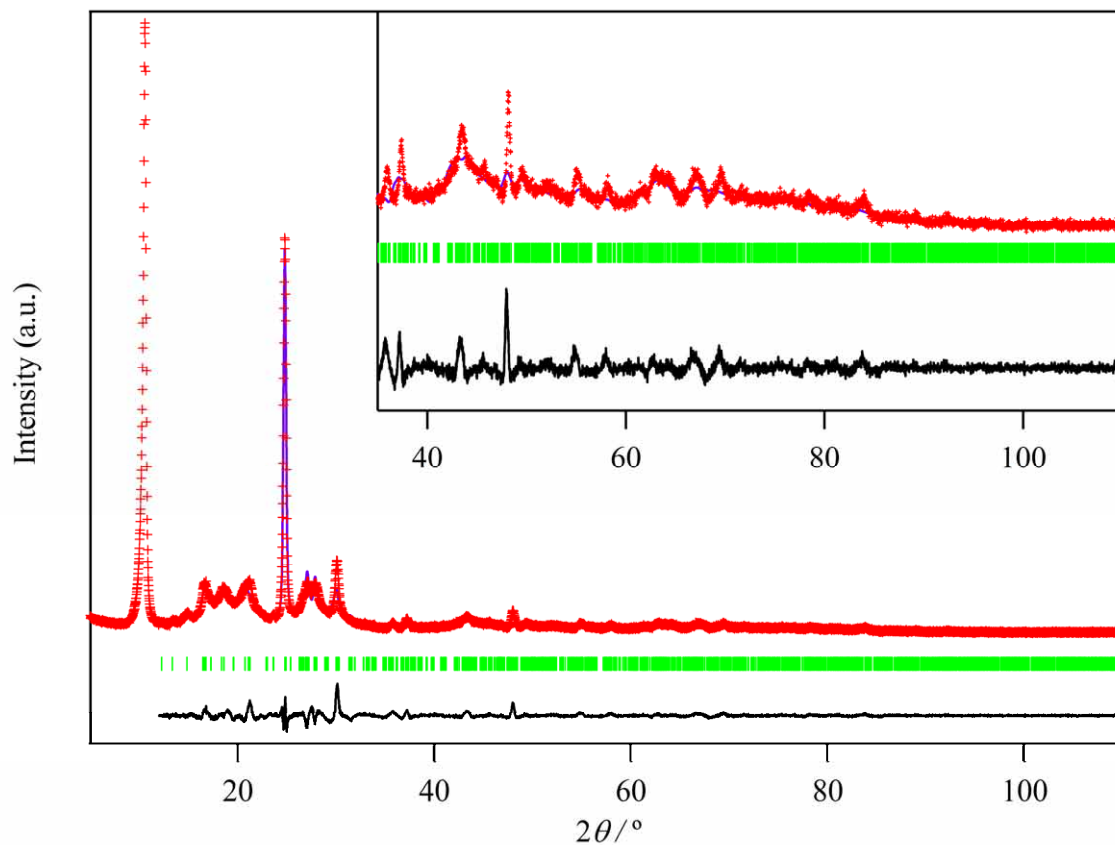

**Fig. S5** Experimental (red, “+” marks) and calculated (purple, solid line) XRD patterns of methoxylated octosilicate, and the observed reflections (green) and difference (black) from the Rietveld refinement.

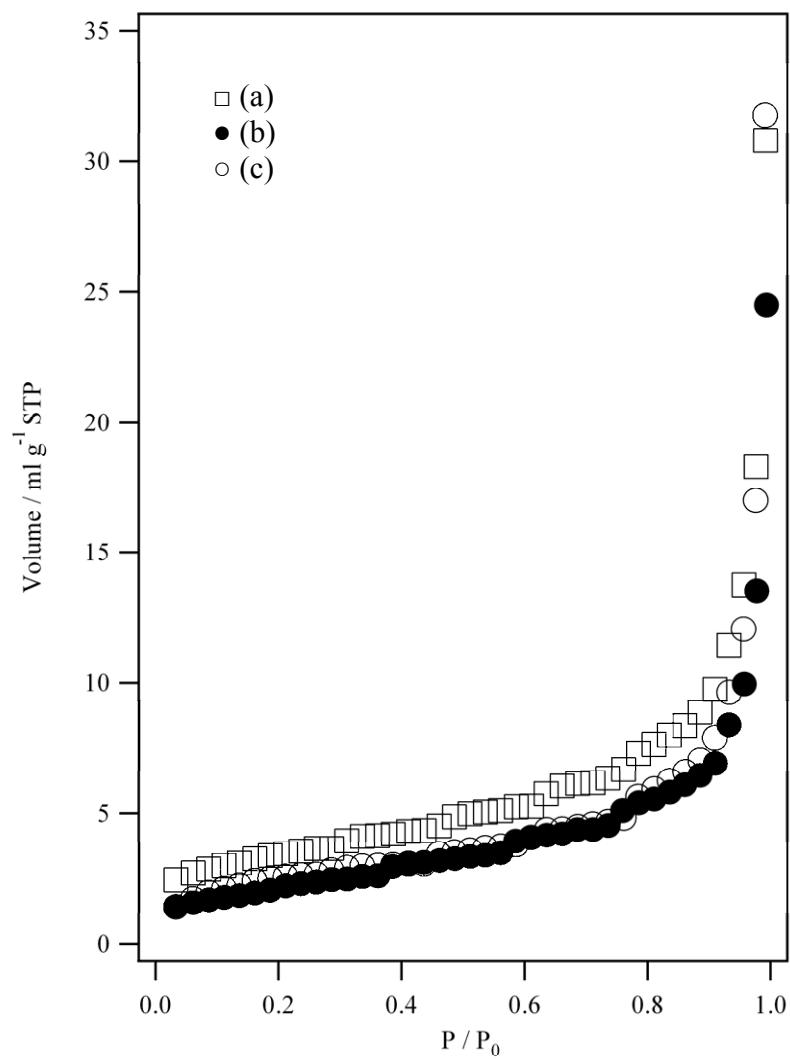

**Fig. S6** N<sub>2</sub> adsorption isotherms of (a) H-octosilicate and methoxylated products with the grafting degrees of (b) 0.95 and (c) 0.42.

**Table S1** Crystal data and refinement details for methoxylated octosilicate.

|                                             |                                                                  |
|---------------------------------------------|------------------------------------------------------------------|
| Formula                                     | Si <sub>8</sub> O <sub>14</sub> (OCH <sub>3</sub> ) <sub>4</sub> |
| M                                           | 572.8                                                            |
| Symmetry                                    | Monoclinic                                                       |
| Space group                                 | No.9, <i>Cc</i>                                                  |
| <i>A</i> /Å                                 | 10.654(8)                                                        |
| <i>B</i> /Å                                 | 10.72(8)                                                         |
| <i>C</i> /Å                                 | 21.447(5)                                                        |
| $\alpha$ /°                                 | 90                                                               |
| $\beta$ /°                                  | 128.447                                                          |
| $\gamma$ /°                                 | 90                                                               |
| Z                                           | 2                                                                |
| Pattern range, $2\theta$ /°                 | 12.00-110.00                                                     |
| Step scan increment, $2\theta$ /°           | 0.005                                                            |
| Step scan time /s                           | 2                                                                |
| Number of data                              | 19600                                                            |
| Number of reflection                        | 2446                                                             |
| Number of structural parameter              | 60                                                               |
| Number of profile parameter                 | 10                                                               |
| Polynomial order of background coefficients | 30                                                               |
| <i>R</i> <sub>p</sub> /%                    | 7.59                                                             |
| <i>R</i> <sub>w</sub> /%                    | 10.5                                                             |

**Table S2** Refined structural parameters of methoxylated octosilicate.

| Atom | Site | Occupancy | <i>x</i>   | <i>Y</i>   | <i>Z</i>   | <i>U</i> /Å <sup>2</sup> |
|------|------|-----------|------------|------------|------------|--------------------------|
| C1   | 4a   | 1         | -1.539(7)  | 0.304(8)   | -0.696(4)  | 0.05                     |
| C2   | 4a   | 1         | -0.344(9)  | 0.068(16)  | 0.282(7)   | = <i>U</i> (C1)          |
| C3   | 4a   | 1         | -1.749(7)  | -0.079(4)  | -0.787(2)  | = <i>U</i> (C1)          |
| C4   | 4a   | 1         | -3.015(4)  | 0.203(13)  | -1.800(6)  | = <i>U</i> (C1)          |
| O1   | 4a   | 1         | -2.652(5)  | 0.025(8)   | -1.454(6)  | 0.02                     |
| O2   | 4a   | 1         | -1.21(8)   | 0.063(4)   | -0.412(7)  | = <i>U</i> (O1)          |
| O3   | 4a   | 1         | -0.452(9)  | 0.164(4)   | 0.091(11)  | = <i>U</i> (O1)          |
| O4   | 4a   | 1         | -1.845(6)  | 0.227(3)   | -0.910(9)  | = <i>U</i> (O1)          |
| O5   | 4a   | 1         | -0.607(9)  | 0.154(2)   | -0.069(13) | = <i>U</i> (O1)          |
| O6   | 4a   | 1         | -2.13(6)   | 0.267(2)   | -1.062(5)  | = <i>U</i> (O1)          |
| O7   | 4a   | 1         | -2.891(5)  | 0.109(3)   | -1.603(5)  | = <i>U</i> (O1)          |
| O8   | 4a   | 1         | -1.421(7)  | 0.003(8)   | -0.573(9)  | = <i>U</i> (O1)          |
| O9   | 4a   | 1         | -1.555(4)  | 0.315(4)   | -0.768(3)  | = <i>U</i> (O1)          |
| O10  | 4a   | 1         | -1.17(8)   | 0.158(6)   | -0.512(8)  | = <i>U</i> (O1)          |
| O11  | 4a   | 1         | -0.492(9)  | 0.073(5)   | 0.197(2)   | = <i>U</i> (O1)          |
| O12  | 4a   | 1         | -2.954(5)  | -0.064(3)  | -1.533(2)  | = <i>U</i> (O1)          |
| O13  | 4a   | 1         | -1.646(7)  | -0.139(7)  | -0.707(6)  | = <i>U</i> (O1)          |
| O14  | 4a   | 1         | -2.107(6)  | 0.080(6)   | -0.972(9)  | = <i>U</i> (O1)          |
| O15  | 4a   | 1         | -2.918(5)  | 0.255(4)   | -1.718(8)  | = <i>U</i> (O1)          |
| O16  | 4a   | 1         | -0.384(9)  | 0.330(5)   | 0.020(7)   | = <i>U</i> (O1)          |
| O17  | 4a   | 1         | -1.742(7)  | -0.044(9)  | -1.162(16) | = <i>U</i> (O1)          |
| O18  | 4a   | 1         | -0.835(8)  | -0.439(19) | -0.340(5)  | = <i>U</i> (O1)          |
| Si1  | 4a   | 1         | -0.848(8)  | -0.059(5)  | -0.018(7)  | 0.01                     |
| Si2  | 4a   | 1         | -2.229(6)  | -0.034(7)  | -0.993(6)  | = <i>U</i> (Si1)         |
| Si3  | 4a   | 1         | -1.008(8)  | -0.159(7)  | -0.494(5)  | = <i>U</i> (Si1)         |
| Si4  | 4a   | 1         | -2.526(5)  | -0.247(5)  | -1.490(9)  | = <i>U</i> (Si1)         |
| Si5  | 4a   | 1         | -1.736(7)  | 0.351(9)   | -0.858(2)  | = <i>U</i> (Si1)         |
| Si6  | 4a   | 1         | -0.483(16) | 0.04(7)    | 0.124(7)   | = <i>U</i> (Si1)         |
| Si7  | 4a   | 1         | -1.604(9)  | -0.062(7)  | -0.628(3)  | = <i>U</i> (Si1)         |
| Si8  | 4a   | 1         | -2.801(6)  | 0.161(5)   | -1.637(6)  | = <i>U</i> (Si1)         |



**Table S3** Bond lengths in the methoxylated octosilicate.

| Atoms   | Length (Å) | Atoms    | Length (Å) |
|---------|------------|----------|------------|
| O1- Si1 | 1.680      | O9- C1   | 1.455      |
| O1- Si6 | 1.671      | O10- Si2 | 1.626      |
| O2- Si2 | 1.650      | O10- Si4 | 1.649      |
| O2- Si5 | 1.633      | O11- C2  | 1.496      |
| O3- Si4 | 1.652      | O12- Si1 | 1.631      |
| O3- Si6 | 1.628      | O12- Si3 | 1.635      |
| O4- Si3 | 1.704      | O13- C3  | 1.490      |
| O4- Si5 | 1.658      | O14- Si3 | 1.633      |
| O5- Si4 | 1.670      | O15- C4  | 1.487      |
| O5- Si7 | 1.627      | O16- Si1 | 1.618      |
| O6- Si3 | 1.673      | O16- Si4 | 1.647      |
| O6- Si8 | 1.685      | O17- Si7 | 1.635      |
| O7- Si1 | 1.669      | O17- Si8 | 1.628      |
| O7- Si8 | 1.631      | O18- Si5 | 1.632      |
| O8- Si2 | 1.696      | O18- Si6 | 1.649      |
| O8- Si7 | 1.671      |          |            |
